# Supplementary material
Source: PubMed Central journal article supplement (PMC3098905)
Supplement: NIHMS272056-supplement-1_si_001.pdf [file NIHMS272056-supplement-1_si_001.pdf]

## Supporting Information

### ABC transporters required for export of wall teichoic acids do not discriminate between different main chain polymers

Kathrin Schirner, Laura K. Stone and Suzanne Walker\*

Department of Microbiology and Molecular Genetics, Harvard Medical School, Boston, MA 02115, USA

\*Corresponding author: [suzanne\\_walker@hms.harvard.edu](mailto:suzanne_walker@hms.harvard.edu)

**Table S1. Strains, plasmids and oligonucleotides.**

| strain             | genotype                                                                                                                                                                           | reference |
|--------------------|------------------------------------------------------------------------------------------------------------------------------------------------------------------------------------|-----------|
| <i>B. subtilis</i> |                                                                                                                                                                                    |           |
| PY79               | Prototrophic derivative of <i>B. subtilis</i> 168                                                                                                                                  | (1)       |
| KS001              | PY79 <i>amyE::P<sub>hyperspank</sub> tarGH<sup>Sa</sup> spc</i>                                                                                                                    | this work |
| KS002              | PY79 $\Delta$ <i>tagGH<sup>Bs</sup>::cat amyE::P<sub>hyperspank</sub> tarGH<sup>Sa</sup> spc</i>                                                                                   | this work |
| KS003              | PY79 <i>tagH</i> $\Delta$ aa276-527                                                                                                                                                | this work |
| KS004              | PY79 <i>amyE::P<sub>hyperspank</sub> tagGH<sup>Bs</sup> spc</i>                                                                                                                    | this work |
| KS005              | PY79 $\Delta$ <i>tagGH<sup>Bs</sup>::cat amyE::P<sub>hyperspank</sub> tagGH<sup>Bs</sup> spc</i>                                                                                   | this work |
| <i>E. coli</i>     |                                                                                                                                                                                    |           |
| XL1blue            | <i>recA1 endA1 gyrA96 thi-1 hsdR17(r<sub>K</sub><sup>-</sup>, m<sub>K</sub><sup>+</sup>) supE44 relA1 lac [ F', <i>proAB</i>, <i>lacIqZ</i><math>\Delta</math>M15::Tn10(tetr)]</i> | Promega   |
| plasmid            | genotype                                                                                                                                                                           | reference |
| pDR111             | <i>amyE::P<sub>hyperspank</sub> spc</i>                                                                                                                                            | D. Rudner |
| pKM074             | <i>bla cat</i>                                                                                                                                                                     | D. Rudner |
| pMAD               | <i>ori<sup>BsTs</sup> lacZ amp mls</i>                                                                                                                                             | (2)       |
| pKS001             | pDR111 <i>tarGH<sup>Sa</sup></i>                                                                                                                                                   | this work |
| pKS002             | pDR111 <i>tarGH<sup>Bs</sup></i>                                                                                                                                                   | this work |

| primer | sequence                                               | features / use                                                                                                    |
|--------|--------------------------------------------------------|-------------------------------------------------------------------------------------------------------------------|
| 1      | catggtcgacacataaggaggaactactaTGAAAGTGTGGTT<br>TAATG    | RBS; Sall; amplification of <i>tarG<sup>Sa</sup></i>                                                              |
| 2      | ctgagtctagaTTACAAGAAGTCTGCAAATTG                       | XbaI; amplification of <i>tarG<sup>Sa</sup></i>                                                                   |
| 3      | cagtctagaacataaggaggaactactATGAACGTTTCGGT<br>AAAC      | RBS, XbaI; amplification of <i>tarH<sup>Sa</sup></i>                                                              |
| 4      | ctagtcgcatgcTTATTTAATAACGAAGCG                         | SphI; amplification of <i>tarH<sup>Sa</sup></i>                                                                   |
| 5      | gactatctagaCTTTACACGGGCGTTTC                           | XbaI; up-stream region of <i>tagG</i> ,<br>for deletion of <i>tagGH<sup>Bs</sup></i>                              |
| 6      | agtcaggatccGTATACGCAACAAATCATTC                        | BamHI; up-stream region of<br><i>tagG</i> , for deletion of <i>tagGH<sup>Bs</sup></i>                             |
| 7      | acagtcggcccCATACTGACTTTGATGTTG                         | EagI; down-stream region of<br><i>tagH</i> , for deletion of <i>tagGH<sup>Bs</sup></i>                            |
| 8      | ctgaggtcgacCGTGAAGGAATTGTAATACG                        | Sall; down-stream region of<br><i>tagH</i> , for deletion of <i>tagGH<sup>Bs</sup></i>                            |
| 9      | CTTACAggatccGGTTGTTACATTCCTTTTATT<br>G                 | BamHI; up-stream region<br>including 5' end of <i>tarH<sup>Bs</sup></i> for<br>truncation                         |
| 10     | GATGAtctagaTTATTTCTTCTTTTTGCGGAAAC<br>G                | XbaI; upstream region including<br>5' end of <i>tarH<sup>Bs</sup></i> ; stop codon for<br>truncation after aa 275 |
| 11     | CGATGtctagaTAAAAAAGGCTATTGGATGAA<br>TG                 | XbaI; downstream region of<br><i>tarH<sup>Bs</sup></i>                                                            |
| 12     | GTAGTgaattcGAAGTCTTATCAGGCTAAGG                        | EcoRI; downstream region of<br><i>tarH<sup>Bs</sup></i>                                                           |
| 13     | catgaagcttacataaggaggaactactaGTCTAAGGAAGAT<br>AAAAAATG | HindIII; amplification of <i>tagGH</i><br>from <i>B. subtilis</i>                                                 |
| 14     | gctagtcgctagcGACATTCATCCAATAGCC                        | NheI; amplification of <i>tagGH</i><br>from <i>B. subtilis</i>                                                    |

**Table S2. Minimal inhibitory concentrations of various antibiotics against strains PY79, KS001 and KS002.**

|              | Targocil | Kanamycin     | Carbenicillin | Tunicamycin | PenicillinG | Erythromycin |
|--------------|----------|---------------|---------------|-------------|-------------|--------------|
| <b>wt</b>    | > 200 µM | 0.2-0.3 µg/ml | 0.16 µg/ml    | 0.125 µg/ml | 0.03 µg/ml  | 0.06 µg/ml   |
| <b>KS001</b> | > 200 µM | 0.2-0.3 µg/ml | 0.16 µg/ml    | 0.125 µg/ml | 0.03 µg/ml  | 0.06 µg/ml   |
| <b>KS002</b> | 1.25 µM  | 0.2-0.3 µg/ml | 0.16 µg/ml    | 0.125 µg/ml | 0.03 µg/ml  | 0.06 µg/ml   |

## Methods

### Growth curves

The growth curve was obtained by diluting cultures into LB with or without 1 mM IPTG in a 96-well microtiter plate incubated at 37°C whilst shaking and taking OD<sub>600</sub> measurements every 10 min or 30 min in a GloMax Multi Detection System (Promega).

### Construction of a complementation strain

The genes *tagGH* from *B. subtilis* were amplified using primers 13+14 and the PCR product was cloned into pDR111 giving pKS002. The plasmid was transformed into *B. subtilis*, where it integrated into the *amyE* locus, giving strain KS004.

Then *tagGH* was deleted from KS004 as described for constructing KS002. Deletion of *tagGH*<sup>Bs</sup> was confirmed by PCR.

Transformation of *B. subtilis* was done according to the method of Anagnostopoulos and Spizizen (23) as modified by Jenkinson (24).

### Construction of a TagH truncation mutant in *B. subtilis*

To construct *B. subtilis* PY79 with a truncated TagH, approximately 1000 bp up-stream of *tagH* was amplified using primers 9+10, including the 5' end of *tagH* until bp 525 (encoding for K275) after which a stop codon was inserted. A fragment of the downstream region starting with the stop codon of *tagH* was amplified using primers 11+12. Both fragments were ligated together, used as a PCR template and re-amplified using primer pair 9+12. This fragment was then cloned into pMAD (2). *B. subtilis* was transformed with the resulting plasmid selecting for erythromycin resistance on plates containing 200 µg/ml chromo-chloro-indolyl-galactopyranoside (X-gal) at 30°C. A single blue colony was picked and inoculated in LB containing erythromycin, grown for 3 h at 30°C and then shifted to 43°C. After 6 h, dilutions were plated on plates containing erythromycin and X-gal. A single blue colony was picked, inoculated in LB and grown over night at 30°C. Dilutions were plated on X-gal plates and white colonies were patched on plates containing either erythromycin or on X-gal. Erythromycin-sensitive white colonies were selected, and truncation of *tagH* was confirmed by PCR and sequencing.

## References

1. Youngman, P., Perkins, J. B., and Losick, R. (1984) Construction of a cloning site near one end of *Tn917* into which foreign DNA may be inserted without affecting transposition in *Bacillus subtilis* or expression of the transposon-borne *erm* gene, *Plasmid* 12, 1-9.
2. Arnaud, M., Chastanet, A., and Debarbouille, M. (2004) New vector for efficient allelic replacement in naturally nontransformable, low-GC-content, Gram-positive bacteria, *Appl Environ Microbiol* 70, 6887-6891.

# Figure S1

**a**

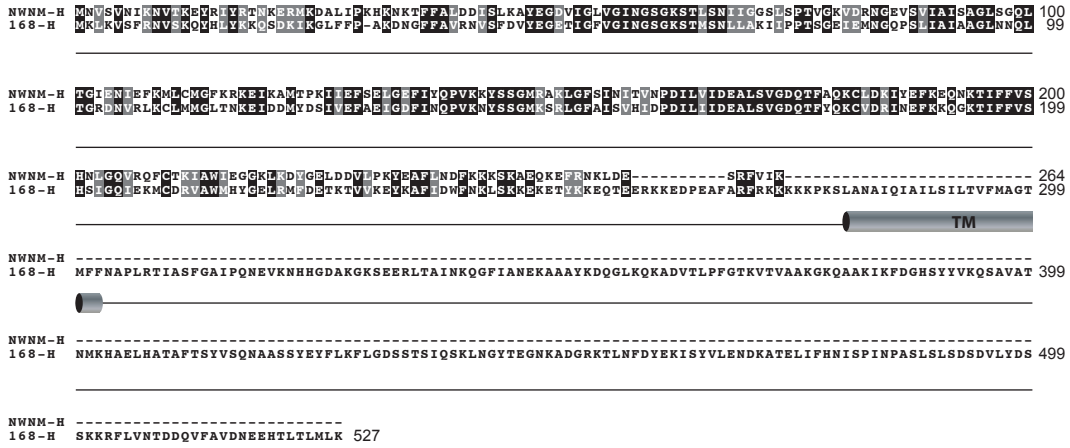

**b**

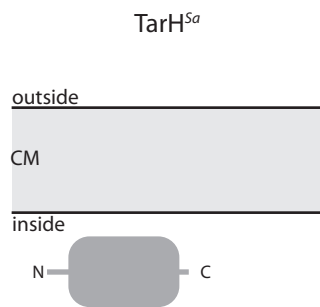

**c**

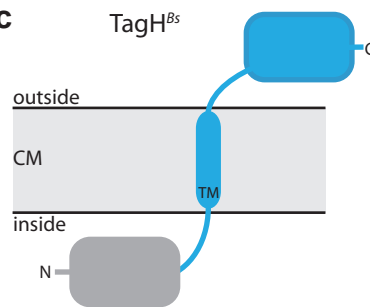

Supporting Figure S1. The ATPase component is partially conserved between *S. aureus* and *B. subtilis*

- Alignment of TarH<sup>Sa</sup> (NWNM-H) and TagH<sup>Bs</sup> (168-H). The barrel indicates a predicted transmembrane helix.
- Topology prediction of TarH from *S. aureus*.
- Topology prediction of TagH from *B. subtilis* PY79.

**Figure S2**

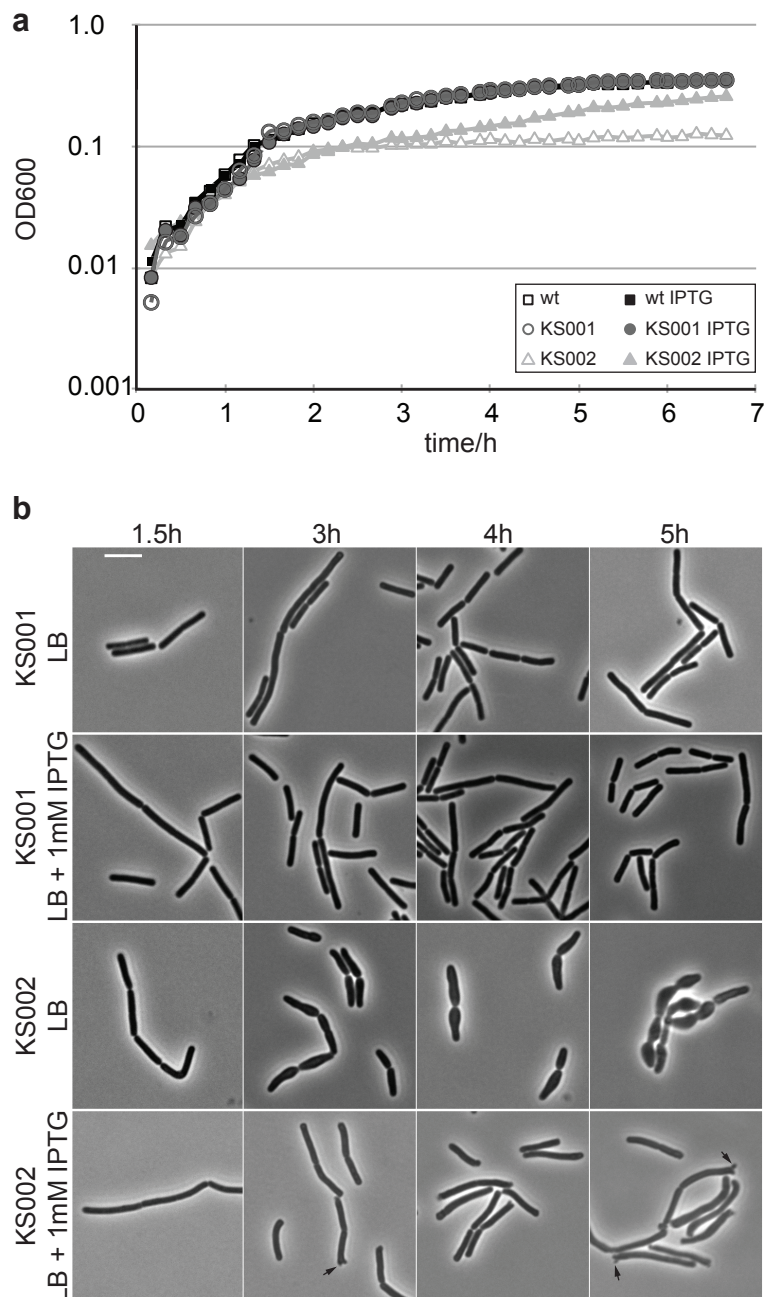

**Supporting Figure S2. KS002 is dependent on the presence of IPTG in the medium.**

a. Growth curve of strains PY79 ( $\square$ ), KS001 ( $\circ$ ) and KS002 ( $\triangle$ ) in LB in the presence (closed symbols) and after washing away IPTG (open symbols). b. Time course microscopy of  $\text{TarGH}^{\text{sa}}$  expression and depletion in KS001 and KS002. Arrows indicate malformed cell poles in KS003. Samples were taken from conditions and at the time points indicated. Scale bar 5  $\mu\text{m}$ .

## Figure S3

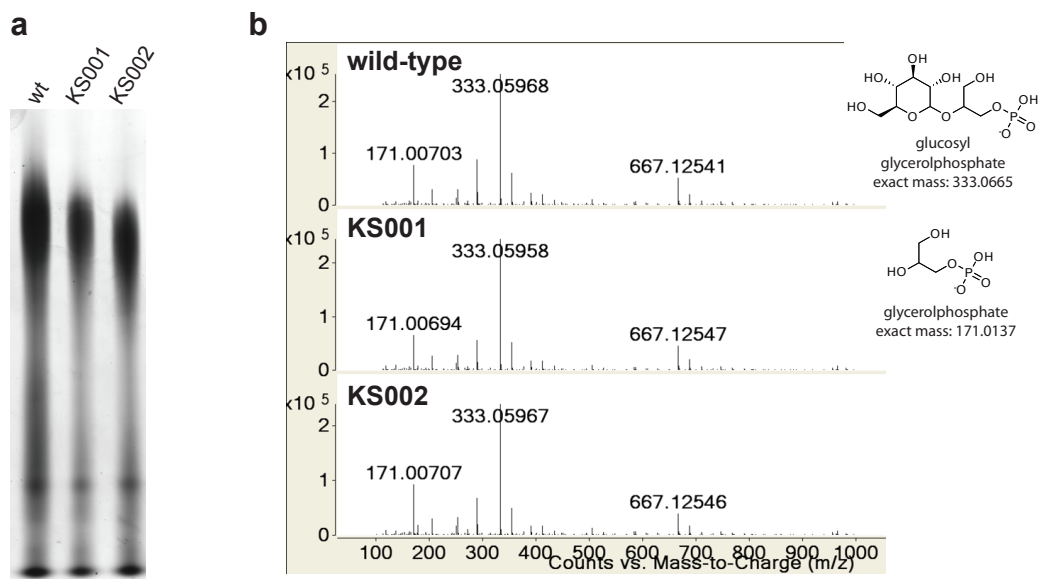

**Supporting Figure S3. The WTA of wild-type, KS001 and KS002 is indistinguishable.**

a. Gel showing the WTA pattern of *B. subtilis* PY79, KS001 and KS002. b. LC/MS data confirming the identity of the WTA monomers as glucosylated glycerol phosphates.

## Figure S4

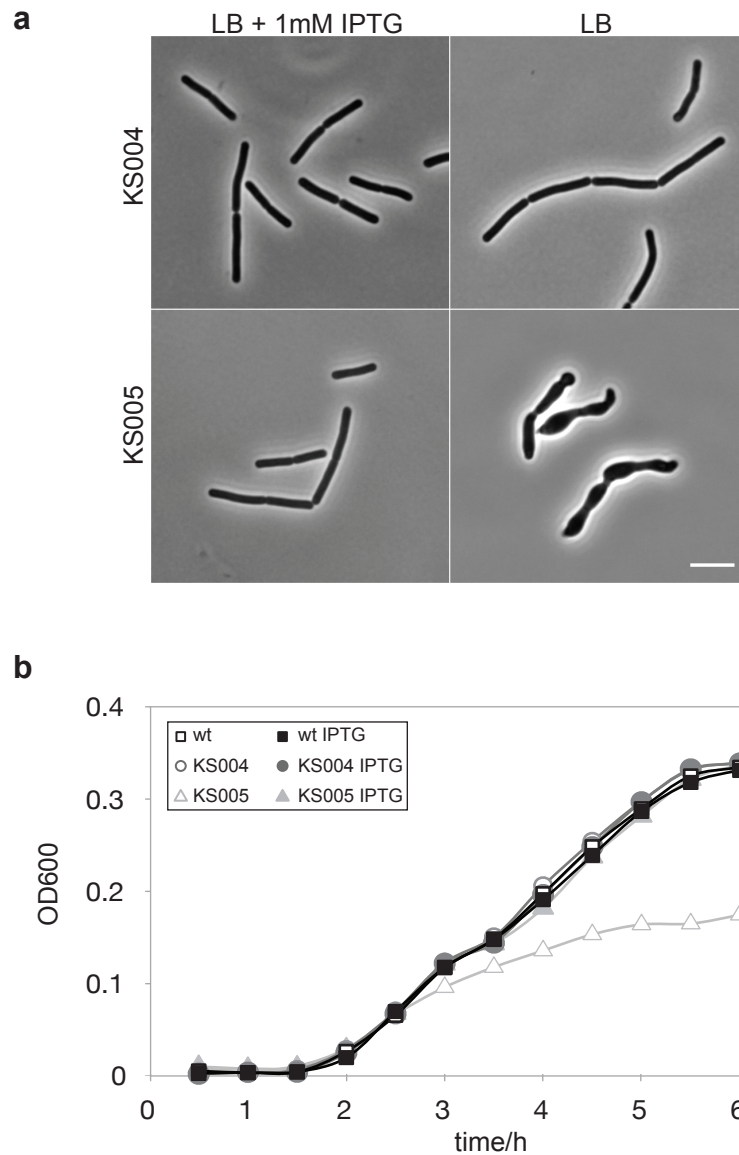

**Supporting Figure S4. The endogenous WTA transporter TagGH<sup>Bs</sup> complements the tagGH deletion.**

a. Morphology of strains KS004 and KS005 grown in LB in the presence and absence of 1 mM IPTG. Scale bar 5  $\mu$ m. b. Growth curve of wild-type, KS004 and KS005 in LB in the presence and after washing out IPTG.



## Figure S5

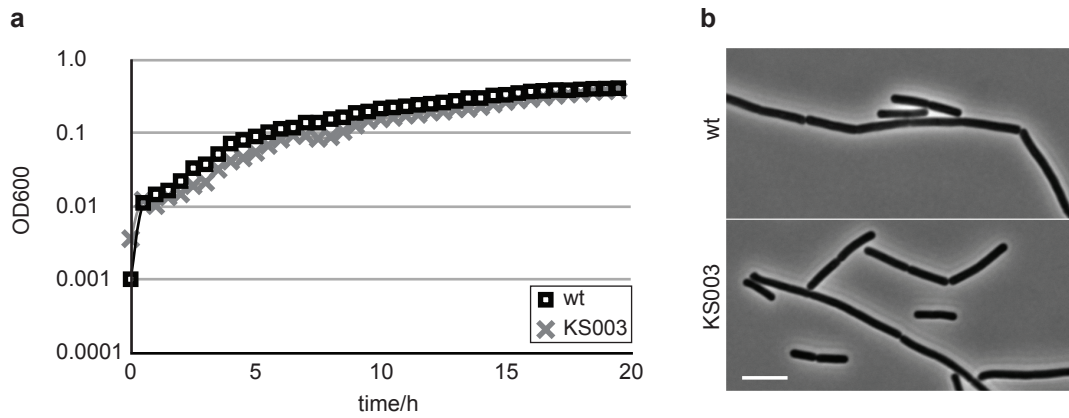

**Supporting Figure S5. Truncation of TarH has no effect on cell growth and morphology of *B. subtilis*.**

a. Growth curve of wild-type (□) and strain KS003 (×) with a truncation of TagH. b. Phase contrast microscopic images of wild-type and KS003. Scale bar 5 μm.
